# Supplementary material for: Open nanofluidic films with rapid transport and no analyte exchange for ultra-low sample volumes
Source: Royal Society of Chemistry journal article supplement (doi:10.1039/c8lc00186c), 2018-01-01
Supplement: c8lc00186c1.zip [file Final Flow Rate Data.xlsx]

## Sheet: Sheet1
		Width	Length	Aspect Ratio	Flow Rate
		mm	mm	unitless	nL/min
	Compilation of Data from 'MPS Avg Flow' Document	2	5	2.5	213.5
		2	10	5	77.57
		2	15	7.5	57.278
		2	20	10	83.72
		4	5	1.25	58.516
		4	10	2.5	58.154
		4	15	3.75	55.519
		4	20	5	56.896
		4	5	1.25	547.2
		4	8	2	356.37
		4	12	3	79.9
		4	16	4	226.338
		4	20	5	53.4
		4	12	3	71.35
		4	12	3	273.691
	Ryan's Data (4mm)	4	4	1	315
		4	8	2	435
		4	12	3	59
		4	16	4	72
		4	20	5	56
	TWINE Data from initial Characterization experiments			10	190.381
				5	508.887
				2	305.506
				2.427	665.04
				2.3	379.48
				6.82	51.8204
				6.67	104.306
				3.93477	435.772
				8.94238	197.996
				8.7757	129.557
				3	586.535
Data From Run			ImageJ Length	Volume Percentage	Video Time(min)	Video Time(s)	Total Time (s)	Total Time (min)	Flow Rate (µl/min)	Flow Rate (nl/s)
Data From Run 1			34	66	1	0	60	1
Capillary2 (µl) =	12.692		36	64	2	0	120	2	0.253841	4.23068
Aspect Ratio	1 to 10		37	63	3	0	180	3	0.12692	2.11534
			39	61	4	0	240	4	0.253841	4.23068
			40	60	5	0	300	5	0.12692	2.11534
			40	60	6	0	360	6	0	0
Data From Run 2			53.774	46.226	1	0	60	1
Capillary2 (µl) =	12.692		67	33	2	0	120	2	1.67865	27.9775
Aspect Ratio	1 to 5		71	29	3	0	180	3	0.507681	8.46136
			73.95	26.05	4	0	240	4	0.374415	6.24025
			77.3	22.7	5	0	300	5	0.425183	7.08639
			80.8	19.2	6	0	360	6	0.444221	7.40369
			82.8	17.2	7	0	420	7	0.253841	4.23068
			85.66	14.34	8	0	480	8	0.362992	6.04987
			88.036	11.964	9	0	540	9	0.301563	5.02605
			90.856	9.144	10	0	600	10	0.357915	5.96526
			93.869	6.131	11	0	660	11	0.382411	6.37352
Data From Run 3			21.848	78.152	0	30	30	0.5
Capillary2 (µl) =	12.692		25.645	74.355	1	0	60	1	0.963833	16.0639
Aspect Ratio 1 to 2	2		26.635	73.365	1	30	90	1.5	0.251302	4.18837
			27.485	72.515	2	0	120	2	0.215765	3.59608
			28.567	71.433	2	30	150	2.5	0.274656	4.57759
			29.337	70.663	3	0	180	3	0.195457	3.25762
			30.668	69.332	3	30	210	3.5	0.337862	5.63103
			31.698	68.302	4	0	240	4	0.261456	4.3576
			32.796	67.204	4	30	270	4.5	0.278717	4.64528
			33.758	66.242	5	0	300	5	0.244195	4.06991
			34.715	65.285	5	30	330	5.5	0.242926	4.04876
			36.037	63.963	6	0	360	6	0.335577	5.59296
			36.916	63.084	6	30	390	6.5	0.223126	3.71877
			38.078	61.922	7	0	420	7	0.294963	4.91605
			38.794	61.206	7	30	450	7.5	0.18175	3.02917
			39.901	60.099	8	0	480	8	0.281002	4.68336
Data From Run 4			50.78	49.22	2	30	150	2.5
Capillary2 (µl) =	12.692		53.886	46.114	3	0	180	3	0.788429	13.1405
Aspect Ratio	1x2.427		56.546	43.454	3	30	210	3.5	0.675216	11.2536
			59.206	40.794	4	0	240	4	0.675216	11.2536
			61.765	38.235	4	30	270	4.5	0.649578	10.8263
			64.586	35.414	5	0	300	5	0.716085	11.9347
			66.966	33.034	5	30	330	5.5	0.604141	10.069
			69.608	30.392	6	0	360	6	0.670647	11.1775
			72.131	27.869	6	30	390	6.5	0.64044	10.674
			74.553	25.447	7	0	420	7	0.614802	10.2467
			77.077	22.923	7	30	450	7.5	0.640694	10.6782
			79.599	20.401	8	0	480	8	0.640186	10.6698
Data From Run 5			51.14	48.86	1	0	60	1
Capillary1 (µl) =	4.98728		59.604	40.396	2	0	120	2	0.41963	6.99384
Aspect Ratio = 1 x 2.3	2.3		67.484	32.516	3	0	180	3	0.390677	6.51128
			75.212	24.788	4	0	240	4	0.383141	6.38568
			82.16	17.84	5	0	300	5	0.34447	5.74116
			88.965	11.035	6	0	360	6	0.33738	5.623
			97.065	2.935	7	0	420	7	0.401584	6.69306
Data From Run 6			49.887	50.113	4	30	270	4.5
Capillary1 (µl) =	4.98728		51.134	48.866	5	30	330	5.5	0.0618241	1.0304
Aspect Ratio = 1 x 6.82	6.82		52.151	47.849	6	30	390	6.5	0.0504211	0.840351
			53.261	46.739	7	30	450	7.5	0.0550319	0.917198
			54.268	45.732	8	30	510	8.5	0.0499253	0.832088
			55.227	44.773	9	30	570	9.5	0.0475456	0.792426
			56.366	43.634	10	30	630	10.5	0.0564696	0.941161
			57.41	42.59	11	30	690	11.5	0.0517597	0.862662
			58.109	41.891	12	20	740	12.3333	0.0415862	0.693104
Data From Run 7			29.37	70.63	0	26	26	0.433333
Capillary2 (µl) =	12.692		33.849	66.151	1	30	90	1.5	0.532946	8.88244
Aspect Ratio = 1 x 6.67	6.67		34.845	65.155	2	30	150	2.5	0.126413	2.10688
			35.388	64.612	3	30	210	3.5	0.0689177	1.14863
			35.725	64.275	4	30	270	4.5	0.0427722	0.712869
			36.162	63.838	5	30	330	5.5	0.0554642	0.924403
			36.635	63.365	6	30	390	6.5	0.0600333	1.00056
			37.102	62.898	7	30	450	7.5	0.0592718	0.987863
			37.552	62.448	8	30	510	8.5	0.0571142	0.951903
			37.956	62.044	9	30	570	9.5	0.0512758	0.854597
			38.423	61.577	10	30	630	10.5	0.0592718	0.987863
			38.69	61.31	11	30	690	11.5	0.0338877	0.564796
Data From Run 8			56.202	43.798	5	30	330	5.5
Capillary2 (µl) =	12.692		57.907	42.093	6	0	360	6	0.432798	7.21331
Aspect Ratio = 1 x 3.93476949590694	3.93477		59.761	40.239	6	30	390	6.5	0.470621	7.84368
			61.575	38.425	7	0	420	7	0.460467	7.67445
			63.249	36.751	7	30	450	7.5	0.424929	7.08216
			65.209	34.791	8	0	480	8	0.497528	8.29213
			66.953	33.047	8	30	510	8.5	0.442698	7.3783
			68.699	31.301	9	0	540	9	0.443206	7.38676
			70.448	29.552	9	30	570	9.5	0.443967	7.39946
			72.265	27.735	10	0	600	10	0.461229	7.68714
			73.754	26.246	10	30	630	10.5	0.377969	6.29948
			75.464	24.536	11	0	660	11	0.434068	7.23446
			76.995	23.005	11	30	690	11.5	0.38863	6.47717
			78.599	21.401	12	0	720	12	0.40716	6.78601
			80.236	19.764	12	30	750	12.5	0.415537	6.92562
Data From Run 9			61.37	38.63	0	0	0	0
Capillary2 (µl) =	12.692		62.224	37.776	0	30	30	0.5	0.21678	3.613
Aspect Ratio = 1 x 8.94238085702844	8.94238		62.901	37.099	1	0	60	1	0.17185	2.86417
			63.782	36.218	1	30	90	1.5	0.223634	3.72723
			64.583	35.417	2	0	120	2	0.203326	3.38877
			65.411	34.589	2	30	150	2.5	0.21018	3.503
			66.212	33.788	3	0	180	3	0.203326	3.38877
			66.906	33.094	3	30	210	3.5	0.176165	2.93609
			67.76	32.24	4	0	240	4	0.21678	3.613
			68.668	31.332	4	30	270	4.5	0.230487	3.84146
			69.416	30.584	5	0	300	5	0.189873	3.16455
			70.163	29.837	5	30	330	5.5	0.189619	3.16032
			70.857	29.143	6	0	360	6	0.176165	2.93609
			71.738	28.262	6	30	390	6.5	0.223634	3.72723
			72.459	27.541	7	0	420	7	0.183019	3.05032
			73.18	26.82	7	30	450	7.5	0.183019	3.05032
			73.874	26.126	8	0	480	8	0.176165	2.93609
			74.594	25.406	8	30	510	8.5	0.182765	3.04609
			75.369	24.631	9	0	540	9	0.196727	3.27878
			76.09	23.91	9	30	570	9.5	0.183019	3.05032
			76.623	23.377	10	0	600	10	0.135297	2.25495
			77.425	22.575	10	30	630	10.5	0.20358	3.393
			78.119	21.881	11	0	660	11	0.176165	2.93609
			78.813	21.187	11	30	690	11.5	0.176165	2.93609
			79.453	20.547	12	0	720	12	0.162458	2.70763
			80.148	19.852	12	30	750	12.5	0.176419	2.94032
			54.469	45.531	10	30	630	10.5
			55.534	44.466	11	0	660	11	0.27034	4.50567
			56.388	43.612	11	30	690	11.5	0.21678	3.613
			57.403	42.597	12	0	720	12	0.257648	4.29414
			58.311	41.689	12	30	750	12.5	0.230487	3.84146
Data From Run 10			51.388	48.612	10	0	600	10
Capillary2 (µl) =	12.692		51.842	48.158	10	30	630	10.5	0.115244	1.92073
Aspect Ratio = 1 x 8.77569631379443	8.7757		52.3	47.7	11	0	660	11	0.116259	1.93765
			52.759	47.241	11	30	690	11.5	0.116513	1.94188
			53.31	46.69	12	0	720	12	0.139866	2.3311
			53.776	46.224	12	30	750	12.5	0.11829	1.9715
			57.634	42.366	0	0	0	0
			58.519	41.481	0	30	30	0.5	0.224649	3.74415
			58.793	41.207	1	0	60	1	0.0695523	1.15921
			59.303	40.697	1	30	90	1.5	0.129459	2.15765
			59.886	40.114	2	0	120	2	0.147989	2.46649
			60.195	39.805	2	30	150	2.5	0.0784368	1.30728
			60.745	39.255	3	0	180	3	0.139612	2.32687
			61.294	38.706	3	30	210	3.5	0.139359	2.32264
			61.88	38.12	4	0	240	4	0.148751	2.47918
			62.327	37.673	4	30	270	4.5	0.113467	1.89111
			62.878	37.122	5	0	300	5	0.139866	2.3311
			63.399	36.601	5	30	330	5.5	0.132251	2.20418
			63.879	36.121	6	0	360	6	0.121844	2.03073
			64.29	35.71	6	30	390	6.5	0.104329	1.73881
			64.841	35.159	7	0	420	7	0.139866	2.3311
			65.22	34.78	7	30	450	7.5	0.0962056	1.60343
			65.6	34.4	8	0	480	8	0.0964595	1.60766
			66.081	33.919	8	30	510	8.5	0.122097	2.03496
			66.56	33.44	9	0	540	9	0.12159	2.02649
			67.317	32.683	9	30	570	9.5	0.192157	3.20262
			67.903	32.097	10	0	600	10	0.148751	2.47918
			68.488	31.512	10	30	630	10.5	0.148497	2.47495
			69.175	30.825	11	0	660	11	0.174389	2.90648
			69.552	30.448	11	30	690	11.5	0.0956979	1.59497
			70.035	29.965	12	0	720	12	0.122605	2.04342
			70.618	29.382	12	30	750	12.5	0.147989	2.46649
			71.068	28.932	13	0	780	13	0.114228	1.90381
Data From Run 11			51.388	48.612	10	0	600	10
Capillary3 (µl) =	19.8313		51.842	48.158	10	30	630	10.5	0.115244	1.92073
Aspect Ratio = 1 x 8.77569631379443	8.7757		52.3	47.7	11	0	660	11	0.116259	1.93765
ID = 1mm
OD = 0.5mm
Run 12 - Data From Run With Ryan			-	42	0	35	35	0.583333
Capillary2 (µl) =	12.692		-	35	1	5	65	1.08333	1.77688	29.6147
Aspect Ratio = 1 x 3	3		-	33.413	2	0	120	2	0.219734	3.66223
			-	30.19	3	0	180	3	0.409064	6.81774
			-	25.4	4	0	240	4	0.607948	10.1325
			-	22.115	5	0	300	5	0.416933	6.94889
			-	19.2	6	0	360	6	0.369973	6.16621
			-	16.04	7	0	420	7	0.401068	6.68447
			-	12.174	8	0	480	8	0.490674	8.1779
