# Supplementary material for: Open nanofluidic films with rapid transport and no analyte exchange for ultra-low sample volumes
Source: Royal Society of Chemistry journal article supplement (doi:10.1039/c8lc00186c), 2018-01-01
Supplement: c8lc00186c1.zip [file Final_ThiolDegradation.xlsx]

## Sheet: Sheet1
	TIME (HOURS)	TGAB			SDMN			MPS			5mer			7mer
		Air	Nitrogen	Sweat	Air	Nitrogen	Sweat	Air	Nitrogen	Sweat	Air	Nitrogen	Sweat	Air	Nitrogen	Sweat
	1	14.7333	14.8333	10.5333	14.4	5.26667	17.3667	10.1667	4.93333	23.3	11.3667	15.6667	6.6	10.5333	9.1	13.6
	2	25.2667	10.1	12.9333	24.1333	4.3	6.8	10.7667	9.7	6.93333	14.5333	19.2	7.96667	8.23333	8.7	10.7333
	4	23	26.8	7.03333	24.4667	6.03333	7.06667	12.5333	8.56667	6.06667	16.1667	19.4667	13.8333	5.7	9.83333	11
	24	31.7	27.8667	12.1	25	6.6	2.3	26.6667	8.3	4.66667	15.5667	21.1	15.7667	8.7	11.0333	13.7
	48	49	25.5	9.46667	13.5667	9.5	7.76667	37.5	9.16667	6	17.5	11.3667	12.7667	9.4	7.5	15.2
	72	30.9667	38.7667	16.7333	23.6	10.9667	5.76667	29.8667	13.2	8.56667	13.4667	12.0667	20.1667	11.2333	11.3333	15.0667
	96	41.8333	25.2667	24.2667	47.2333	10.0667	19.2667	53.8	12.3667	10.0667	9.2	15.1667	19.4	10.3333	9.16667	13.9667
	168	70.4333	41.2	23.3667	0	0	0	50.6333	14.5333	20.4667	13.6667	17.7667	9.63333	12.3333	13.9	12.4667
